# Supplementary material for: Emerging New Crop Pests: Ecological Modelling and Analysis of the South American Potato Psyllid Russelliana solanicola (Hemiptera: Psylloidea) and Its Wild Relatives
Source: PLOS journal article supplement (doi:10.1371/journal.pone.0167764), 2017-01-04
Supplement: S5 (10.1371/journal.pone.0167764.s005) [file journal.pone.0167764.s005.pdf]

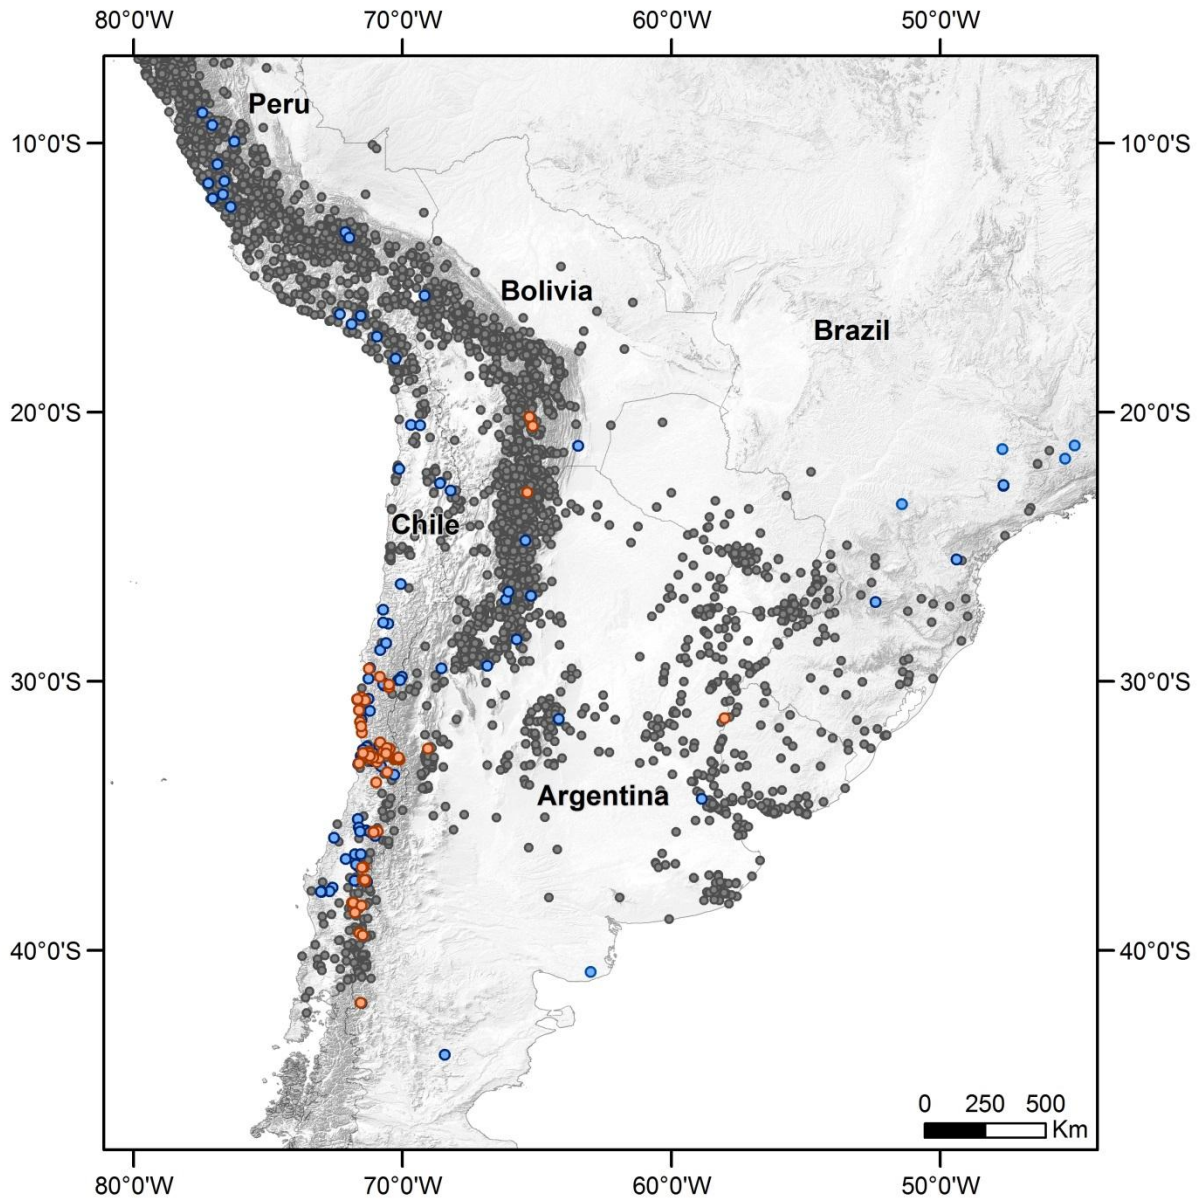

1

2 **S3 Fig. Co-occurrence of *Russelliana* and potato wild relatives.** Known geographical  
 3 localities of 19 *Russelliana* species from Argentina, Bolivia, Brazil, Chile, Peru and Uruguay,  
 4 overlapping with point data (grey) of potato crop wild relatives (CWR) available from  
 5 Solanaceae Source (<http://solanaceaesource.org/>). Blue points represent Solanaceae feeding  
 6 species and orange points represent non-Solanaceae feeding species.

7
